# Supplementary material for: Black thin layers generate strong structural colors: a biomimetic approach for creating one-dimensional (1D) photonic crystals
Source: Royal Society of Chemistry journal article supplement (doi:10.1039/c1jm13094c), 2011-01-01
Supplement: c1jm13094c.pdf [file c1jm13094c.pdf]

## Sputtering Time

10 s    20 s    30 s    40 s    50 s    60 s

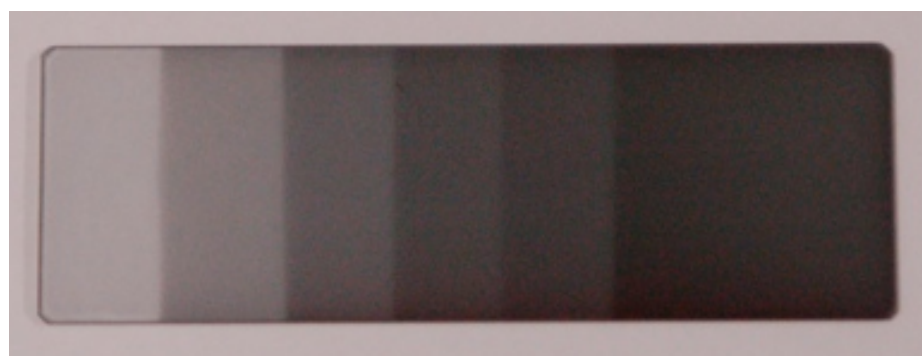

Substrate : Quartz glass

S1. A photograph of Os sputtered glass quartz glass substrate.

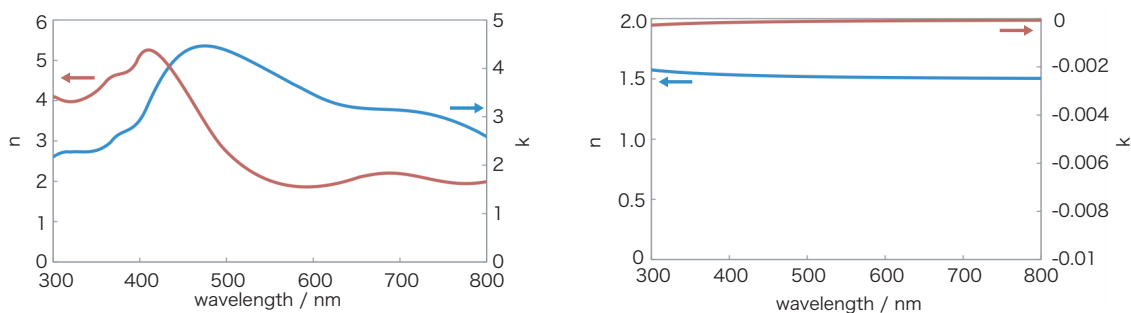

S2. Real and imaginary parts of refractive indices of Os (left) and PB (right) measured by using a spectroscopic ellipsometry, respectively.
